# Supplementary material
Source: publisher figshare collection journal article supplement (https://sage.figshare.com/ndownloader/files/23804922)
Supplement: Supplementary file 1 [file 23804922]

Supporting information


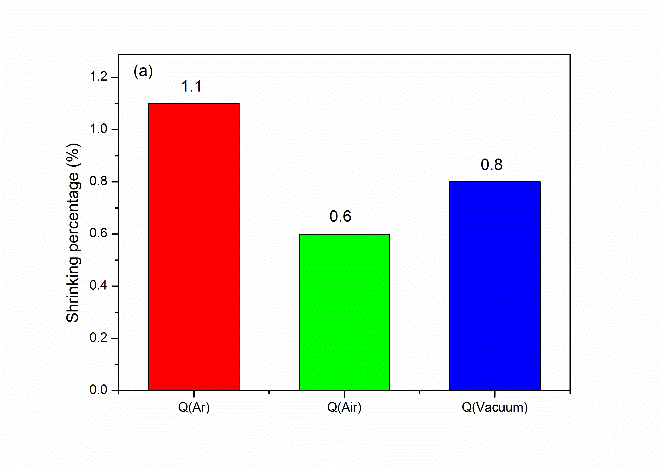

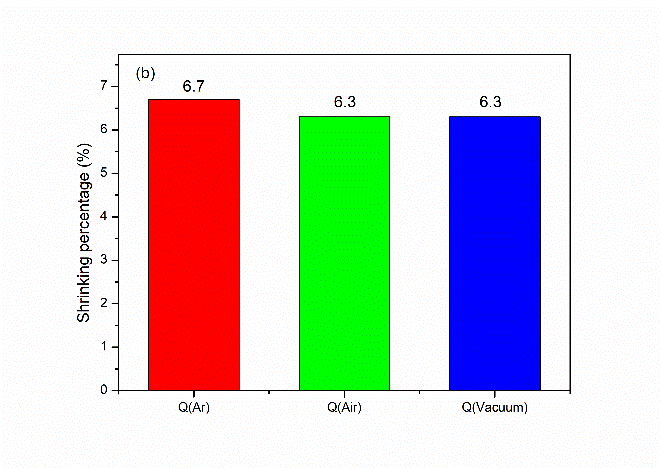


Fig. S1. Shrinking percentage of the specimens debinded or sintered under different atmospheres: (a) debinded and (b) sintered.
